# Supplementary material for: Molecular and virulence differences of Klebsiella pneumoniae isolated from blood
Source: Front Microbiol. 2025 Jul 30;16:1650010. doi: 10.3389/fmicb.2025.1650010 (PMC12343682; doi:10.3389/fmicb.2025.1650010)
Supplement: Supplementary file 1 [file Table_1.xls]

## Sheet: Sheet1
MLST, capsule types (including K and O loci), and antimicrobial resistance genes of six K. pneumoniae isolates.
Strain	MLST	K type	O type	Antimicrobial resistance	Antimicrobial resistance gene
Kpn1	11	K64	O2a	Fluoroquinolone, Fosfomycin and Beta-lactam	OqxA, OqxB, fosA, blaKPC-2, blaSHV-182, blaCTX-M-65
Kpn2	15	K19	O1	Beta-lactam, Trimethoprim, Fosfomycin, MLS - Macrolide, Lincosamide and Streptogramin B, Phenicol, Sulphonamide, Fluoroquinolone and Aminoglycoside	blaCTX-M-15, blaTEM-1B, blaSHV-106, blaKPC-2, blaOXA-1, blaSHV-28, dfrA12, fosA, mph(A), floR, sul1, sul2, OqxA, OqxB, aac(6')-Ib-cr, qacE, aph(4)-Ia, aadA2, aac(3)-IV
Kpn3	950	K7	O1	Aminoglycoside, Beta-lactam, Trimethoprim, Fosfomycin, Tetracycline, Sulphonamide and Fluoroquinolone	aac(3)-IIa, blaCTX-M-15, blaTEM-1B, blaSHV-98, blaSHV-78, blaSHV-26, blaSHV-194, blaSHV-199, blaSHV-179, blaSHV-145, dfrA1, fosA, tet(A), sul1, OqxA, OqxB, qnrS1, qacE
Kpn4	65	K2	O1	Beta-lactam, Fluoroquinolone and Fosfomycin	blaSHV-67, blaSHV-11, OqxA, OqxB, fosA
Kpn5	23	K1	O1	Fosfomycin, Fluoroquinolone and Beta-lactam	fosA, OqxA, OqxB, blaSHV-190
Kpn6	11	K64	O2a	Phenicol, Sulphonamide, Beta-lactam, Trimethoprim, Fluoroquinolone, Aminoglycoside, Tetracycline and Fosfomycin	catA2, sul2, blaSHV-12, blaSHV-182, blaCTX-M-65, blaTEM-1B, blaKPC-2, blaLAP-2, dfrA14, qnrS1, rmtB, tet(A), fosA
